# Supplementary material for: Rational Photodeposition of Cobalt Phosphate on Flower-like ZnIn2S4 for Efficient Photocatalytic Hydrogen Evolution
Source: MDPI journal article supplement (doi:10.3390/molecules29020465), 2024-01-17
Supplement: s1 [file s1]

# Supporting Information

## Rational Photodeposition of Cobalt Phosphate on Flower-like ZnIn<sub>2</sub>S<sub>4</sub> for Efficient Photocatalytic Hydrogen Evolution

Yonghui Wu <sup>1</sup>, Zhipeng Wang <sup>1</sup>, Yuqing Yan <sup>1</sup>, Yu Wei <sup>1</sup>, Jun Wang <sup>1</sup>, Yunsheng Shen <sup>1</sup>, Kai Yang <sup>1</sup>, Bo Weng <sup>2</sup> and Kangqiang Lu <sup>1,\*</sup>

<sup>1</sup> Jiangxi Provincial Key Laboratory of Functional Molecular Materials Chemistry, School of Chemistry and Chemical Engineering, Jiangxi University of Science and Technology, Ganzhou 341000, China; 13207070350@163.com (Y.W.); chemcatalyst@yeah.net (Z.W.); 18797912889@163.com (Y.Y.); 18225906201@163.com (Y.W.); wj15270473375@126.com (J.W.); shenyunsheng1@163.com (Y.S.); yangkai@jxust.edu.cn (K.Y.)

<sup>2</sup> cMACS, Department of Microbial and Molecular Systems, KU Leuven, 3001 Leuven, Belgium; bo.weng@kuleuven.be

\* Correspondence: kqlu@jxust.edu.cn

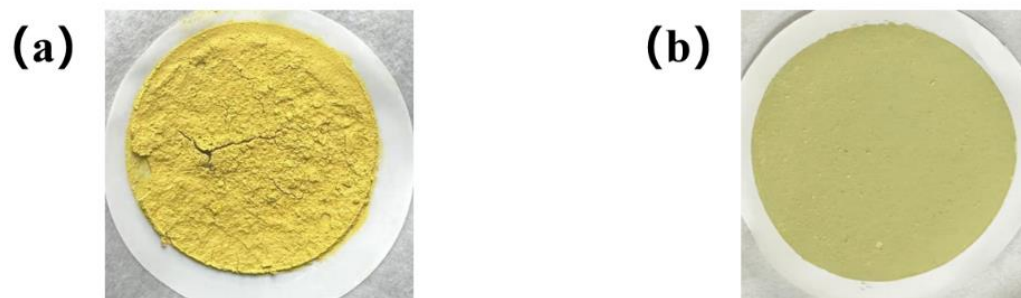

**Figure S1.** Schematic representation of the samples for ZnIn<sub>2</sub>S<sub>4</sub> (a) and ZnIn<sub>2</sub>S<sub>4</sub>-5%Co-Pi (b)

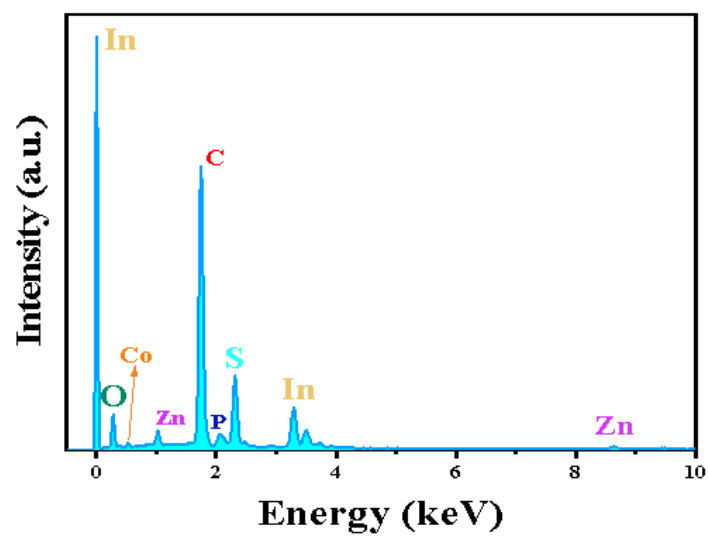

**Figure S2.** EDS spectrum of ZnIn<sub>2</sub>S<sub>4</sub>-5%Co-Pi

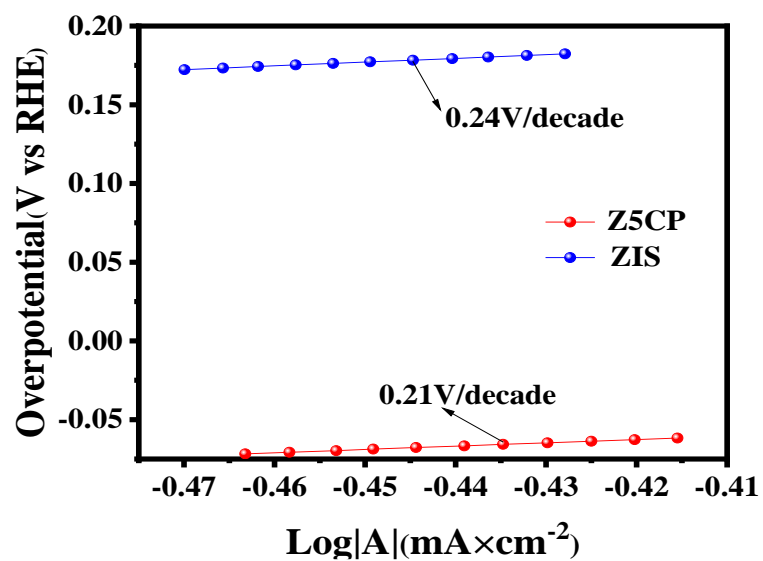

**Figure S3.** Tafel slope plots for ZnIn<sub>2</sub>S<sub>4</sub> and ZnIn<sub>2</sub>S<sub>4</sub>-5%Co-Pi

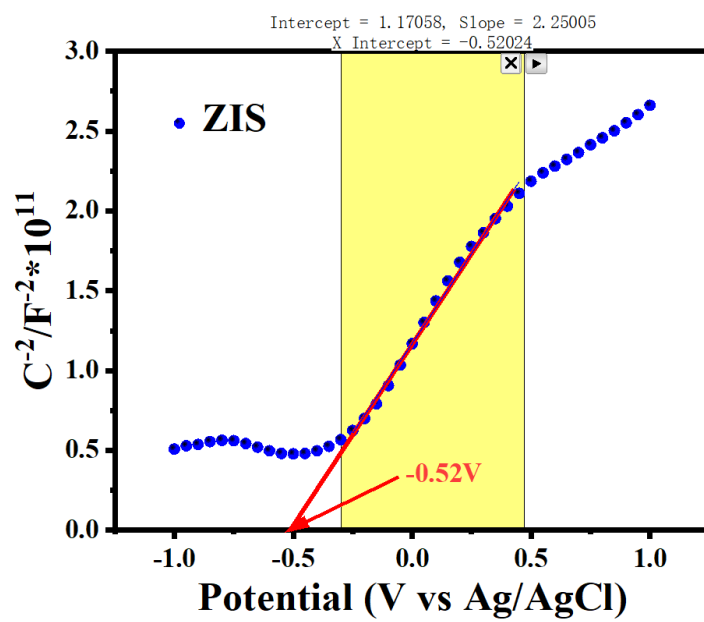

**Figure S4.** Mott-Schottky plots for ZnIn<sub>2</sub>S<sub>4</sub>.
